# Supplementary material for: DNA circuits driven by conformational changes in DNAzyme recognition arms
Source: RSC Adv. 2020 Feb 24;10(13):7956–66. doi: 10.1039/d0ra00115e (PMC9049901; doi:10.1039/d0ra00115e)
Supplement: RA-010-D0RA00115E-s001 [file RA-010-D0RA00115E-s001.pdf]

## Supplementary Information

### DNA circuits driven by conformational changes in DNAzyme recognition arms

Xinyi Sun,<sup>a†</sup> Xuedong Zheng,<sup>b†</sup> Sue Zhao,<sup>a</sup> Yuan Liu,<sup>c</sup> and Bin Wang,<sup>\*a</sup>

<sup>1</sup> Key Laboratory of Advanced Design and Intelligent Computing, Ministry of Education, School of Software Engineering, Dalian University, Dalian 116622, China; E-mail: wangbinpaper@gmail.com

<sup>2</sup> College of Computer Science, Shenyang Aerospace University, Shenyang 110136, China; xuedongzheng@163.com

<sup>3</sup> School of Computer Science and Technology, Dalian University of Technology, Dalian 116024, China; E-mail: Liuyuan.dlut@gmail.com

\* Correspondence: wangbinpaper@gmail.com; Tel.: +86-0411-87402106 (B.W.); Fax: +86-0411-87403733 (B.W.)

† These authors contributed equally to this work.

## Contents

|                                                                                     |    |
|-------------------------------------------------------------------------------------|----|
| Supplementary Information.....                                                      | 1  |
| DNA circuits driven by conformational changes in DNAzyme recognition arms .....     | 1  |
| Table S1. DNA sequences .....                                                       | 3  |
| 1 Materials .....                                                                   | 6  |
| 2 Methods .....                                                                     | 6  |
| 2.1 YES Logic gate .....                                                            | 6  |
| 2.2 OR Logic gate .....                                                             | 7  |
| 2.3 AND Logic gate .....                                                            | 8  |
| 2.4 Two-stage YES cascade circuit and YES-AND cascade logic .....                   | 9  |
| 2.4 Self-catalytic DNA circuit .....                                                | 10 |
| 2.5 Application of the principle of conformation changes in cleavage reaction ..... | 10 |

Table S1. DNA sequences

Table S1. DNA sequences

| Index | Name            | Sequence (5' to 3')                                                 | Length |
|-------|-----------------|---------------------------------------------------------------------|--------|
| 1     | d0              | AGGATGAATGTTT                                                       | 13     |
| 2     | E6              | GGAGACAGCGATCCGGAACGGCACC<br>CATGTAGGATGAATG                        | 40     |
| 3     | t*xd*1          | CATTCATCCTGGTCTCC                                                   | 17     |
| 4     | t*xd*2          | CATTCATCCTCGGTCTCC                                                  | 18     |
| 5     | t*xd*3          | CATTCATCCTTAGGTCTCC                                                 | 19     |
| 6     | ORE10           | GCGTGCAGCGATAGCGTAGCTCACCC<br>ATGTCCTTAATCTGC                       | 41     |
| 7     | ORE20           | CCTTAATCTGCAGCGATCCGGAACGG<br>CACCCATGTCGTCAAC                      | 42     |
| 8     | ORt*d*b*        | GTTGACGTGGCAGATTAAGGTGGCAC<br>GC                                    | 28     |
| 9     | ORd0            | CCTTAATCTGC                                                         | 11     |
| 10    | ANDE1           | TGACCTCCACAGCGATCCGGAACGGC<br>ACCCATGTATACTCCTCT                    | 44     |
| 11    | ANDE2           | CATCTCATTAGCGATCCGGAACGGC<br>ACCCATGTACCCACCTAG                     | 44     |
| 12    | t1*d1*d2*t<br>2 | AGGTGGGTGGAATGAGATGAGAGGA<br>GTATGGTGGAGGT                          | 38     |
| 13    | d1d2            | ATACTCCTCTCCATCTCATTC                                               | 21     |
| 14    | Emn             | GCGACCTCCCCATACTCCTCTCCATCT<br>TCAGCGATCCGGAACGGCACCCATGT<br>TCTCTC | 59     |
| 15    | n0              | ATGGCGACCTCCCCATACTCCTCTCC<br>ATCTTC                                | 32     |

|    |        |                                                           |    |
|----|--------|-----------------------------------------------------------|----|
| 16 | m*n*   | GAGAGACGAAGATGGAGAGGAGTAT<br>GGGGAGGTCGC                  | 36 |
| 17 | n0*    | GAAGATGGAGAGGAGTATGGGGAGG<br>TCGCCAT                      | 32 |
| 18 | Eab    | ACCTCCAGCGATCCGGAACGGCACCC<br>ATGTCCATACTCCTCTCCATCTTCTCC | 53 |
| 19 | b      | CCATACTCCTCTCCATCTTCTCC                                   | 23 |
| 20 | a*b*   | GGAGAAGATGGAGAGGAGTATGGCG<br>GAGGT                        | 30 |
| 21 | Z1Z2   | TAATGACCTCCACAGCGATCCGGAAC<br>GGCACCCATGTTCTCTC           | 43 |
| 22 | Z1Y1   | TAATGACCTCCACAGCGATCAGCGAT<br>TAACAGAGGAGTAT              | 40 |
| 23 | Z2Y2   | GAATGAGATGGTTACACCCATGTTCT<br>CTC                         | 29 |
| 24 | R*T*   | ATACTCCTCTCCATCTCATTC                                     | 21 |
| 25 | V      | GCCTAATGACCTCCACAGCGAT                                    | 22 |
| 26 | W1W2   | GAGAGAATCGCTGTGGAGGTCATTA                                 | 25 |
| 27 | V1*V2* | ATCGCTGTGGAGGTCATTAGGC                                    | 22 |
| 28 | P*R*   | TGACCTCCACAGCGATCCGGAACGGC<br>ACCCATGTATACTCCTCT          | 44 |
| 29 | T*Q*   | CATCTCATTACAGCGATCCGGAACGGC<br>ACCCATGTACCCACCTAG         | 44 |
| 30 | PRTQ   | AGGTGGGTGGAATGAGATGAGAGGA<br>GTATGGTGGAGGT                | 38 |
| 31 | AND1   | TCCTCTTATTCTTCT                                           | 15 |
| 32 | AND2   | CTCCTCATATTCTTCT                                          | 16 |
| 33 | AND3   | TCCTCTCTACTCTTCT                                          | 16 |
| 34 | AND4   | TCCTCTCTAACTCTTCT                                         | 17 |

|    |      |                                              |    |
|----|------|----------------------------------------------|----|
| 35 | AND5 | TCCTCTCTAAACTCTTCT                           | 18 |
| 36 | AND6 | TCCTCTCAGAACTCTTCT                           | 18 |
| 37 | AND7 | TCCTCTCAGCTCTTCT                             | 16 |
| 39 | CF   | CTCTTCAGCGATCCGGAACGGCACCC<br>ATGTATGATGCTTC | 40 |
| 39 | C*F* | GAAGCATCATT/rA/GGAAGAG                       | 19 |
| 40 | F    | ATGATGCTTGTTT                                | 13 |

All of the sequences used in this work were designed using Nupack.

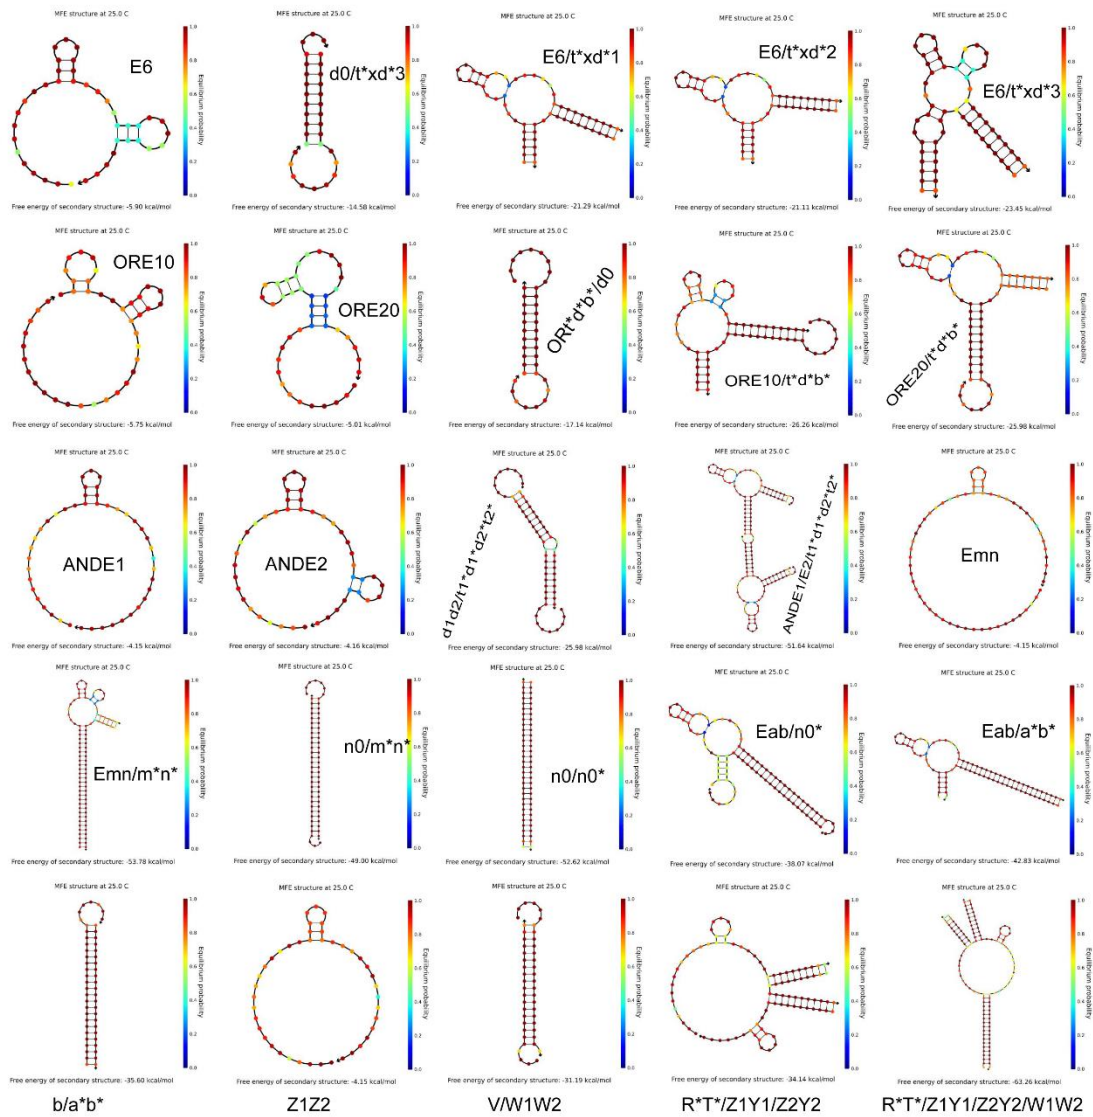

**Figure S1.** Nupack simulation for sequences in Table S1.

# 1 Materials

All DNA strands (Table S1) used herein were purchased from Sangon Biotech (Shanghai, China). The unmodified DNA strand was purified by PAGE, and the DNA strand with the fluorophore and the quencher group modification was purified by high-performance liquid chromatography (HPLC). In the gel electrophoresis experiment, we used 12% PAGE (5.89mL pure water, 3 mL of mother liquor of acrylamide at a concentration of 40% (300mL pure water, 190 g of acrylamide and 10 g of N, N' -methylenebis), 1 mL 10x TAE, 100 uL ammonium persulfate (APS), 10 uL N, N, N', N'-Tetramethylethylene diamine (TEMED)). The gel duration is 40 min. The results of the staining were performed using Stains All (0.1 g of Stains All powder, 450 mL of formamide, 550 mL of pure water). The pure water(18.2M $\Omega$ /cm) used in all the experimental protocols was obtained from the Milli-Q purification system. Other chemicals were of reagent grade and were used without further purification.

## 2 Methods

### 2.1 YES Logic gate

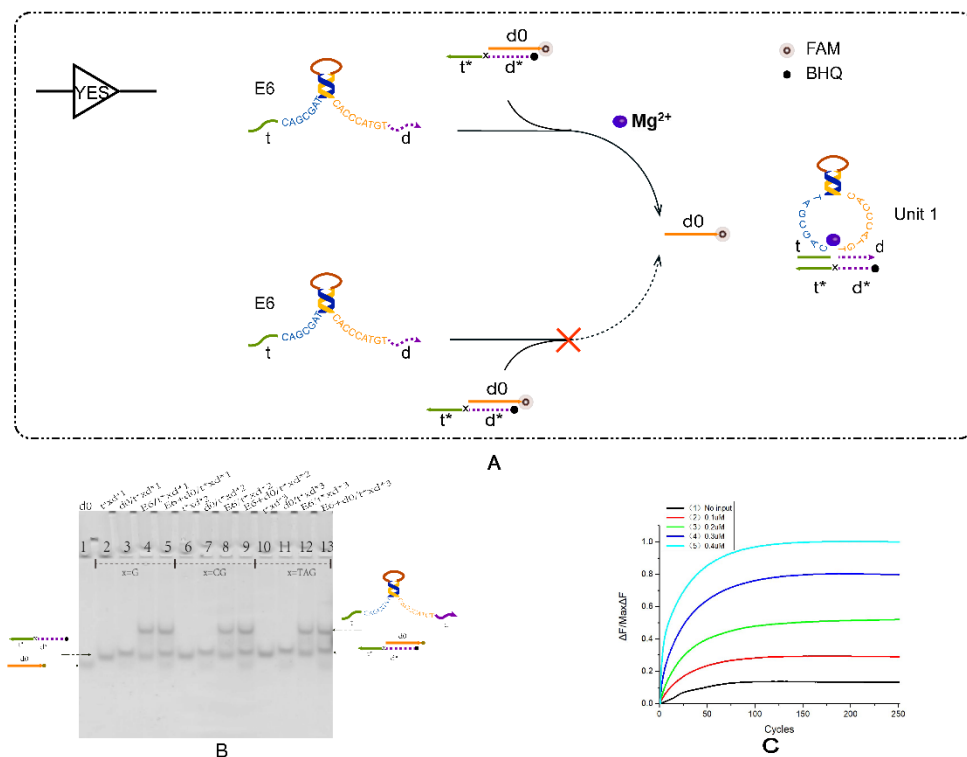

**Figure S2.** (A) YES logic gate comes in two forms, one with a switch and one without a switch. That is, no Mg<sup>2+</sup> are added to the solution, and Mg<sup>2+</sup> are added to one solution. (B) PAGE in the absence of Mg<sup>2+</sup> in the solution. (C) YES logic gate input strand concentration gradient comparison, input strand concentration is 0.1uM, 0.2uM, 0.3uM, 0.4uM, and the solution concentration at no input is 0.4uM. Sampling scan interval time was set to 6 s, for a total of 251 cycles.

In the basic logic gate, we performed two gel electrophoresis experiments in order to verify the effect of

## 2.2 OR Logic gate

**A** Schematic of the DNA-based logic gate. The gate takes two inputs,  $t^*$  and  $d^*(10)$ , and produces an output  $b^*$ . The gate is implemented using DNA strands and a FAM fluorophore. The gate is shown in two states: "ON" (output  $b^*$  is present) and "OFF" (output  $b^*$  is absent). The gate is activated by the presence of  $Mg^{2+}$ . The legend indicates that FAM is represented by a grey circle and BHQ by a black circle.

**B** Gel electrophoresis image showing the results of the logic gate. The lanes are labeled 1 through 9. The gel shows bands corresponding to the input strands and the output strand  $b^*$ . The bands are labeled with their respective sequences:  $t^*$ ,  $d^*(10)$ , and  $b^*$ .

**C** Gel electrophoresis image showing the results of the logic gate. The lanes are labeled 1 through 8. The gel shows bands corresponding to the input strands and the output strand  $b^*$ . The bands are labeled with their respective sequences:  $t^*$ ,  $d^*(10)$ , and  $b^*$ .

**D** Plot of  $\Delta F/\text{Max}\Delta F$  versus Time (Cycles). The plot shows the fluorescence response of the logic gate over time. The y-axis ranges from 0.0 to 1.0, and the x-axis ranges from 0 to 300 cycles. The legend indicates that the curves correspond to different input combinations: (0, 0) (black), (0, 1) (red), (1, 0) (green), and (1, 1) (blue).

7

Mg<sup>2+</sup> ion. Lane 1: double strand d0/t\*d\*b\*; lane 4: E10 + double strand d0/t\*d\*b\*; lane 5: E20 + double strand d0/t\*d\*b\*; lane 6: E10 + E20 + double stranded d0/t\*d\*b\*; lane 7: DNAzyme E10; lane 8: DNAzyme E20. (D) OR logic gate fluorescence intensity curve. The duration is 30 minutes and the scanning interval is 6 s.

## 2.3 AND Logic gate

Initially, the AND logic solved the problem of low binding rates between two input strand DNAzymes and double-stranded substrates. As shown in Figure S3, the sixth, seventh, and eighth tracks are (1,0), (0,1), (1,1). It can be seen that there are a large number of input strands remaining, which cannot be ideal result. This problem is solved by increasing the content of CG bases in the DNAzyme recognition domain. Then, new problems arise. Although the input strand is combined with a double-stranded substrate, it produces less output. We began to explore the method of combining double-stranded substrates. We tried to mismatch the base and base bubbling in order to make the output strand easier to drop. It was confirmed by PAGE that when there is a bubbling of a base length, the number of double-stranded substrates formed is the largest, and there is no remaining. At this point, the output strand is easy to fall, and the leakage is minimal at this time. In other cases, some of the strands do not form a double strand, which is likely to cause leakage.

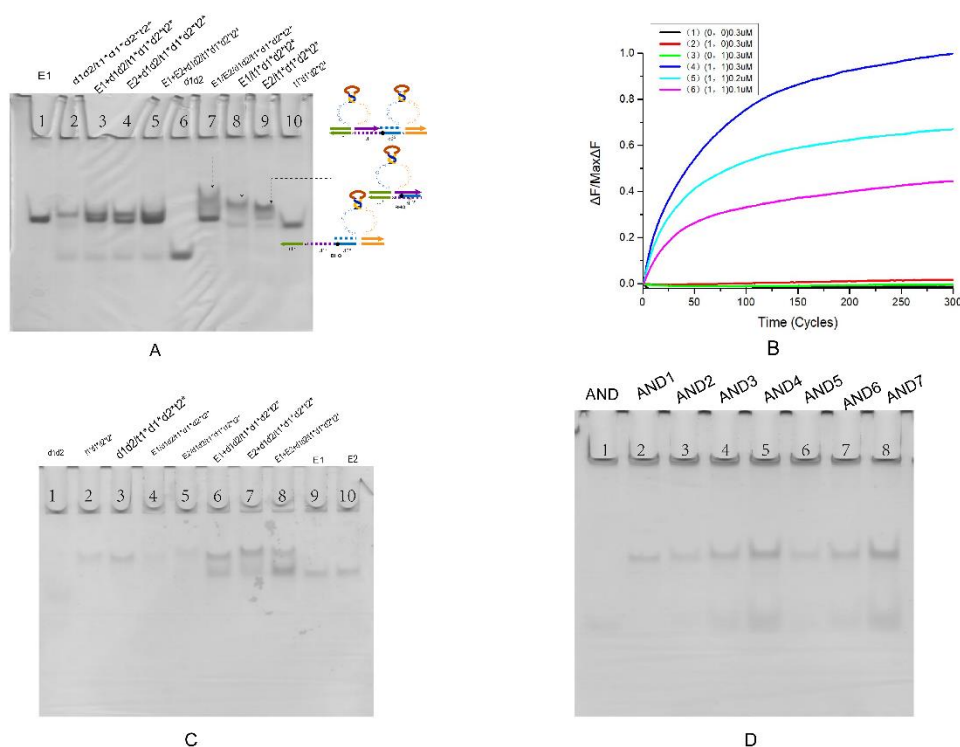

**Figure S4.** (A) PAGE without Mg<sup>2+</sup>. The 2nd, 3rd, 4th, and 5th tracks are (0,0), (1,0), (0,1), (1,1). (B) AND logic gate fluorescence intensity curve. The input strand concentrations were 0.1 uM, 0.2 uM, 0.3 uM. The other DNA strand concentrations were 0.3 uM. And the sampling scan interval is set to 10 s for a total of 300 cycles. (C) Failure AND logic gate PAGE. (D) Select the PAGE of the double-stranded substrate binding mode. Lane 1: Comparison of output single strands; Lane 2: one base bubbling; Lane 3: 2 bases bubbling; Lane 4: 3 bases bubbling; Lane 5: 4 bases Bubbling; lane 6: one base mismatch and bubbling; lane 7: 3 base mismatch; lane 8: 4 base mismatch.

## 2.4 Two-stage YES cascade circuit and YES-AND cascade logic

In the process of inactivating the DNAzyme of the second step, the YES logic circuit starts to select the blocking domain on one side and the conserved domain in part. However, as shown in Figure S4AB, the leakage of the fluorescent image is very serious. Increasing the number of bases bound to DNAzymes does not solve this problem. Finally, we changed our mindset to hide most of the recognition domain of DNAzymes in the site of double-stranded binding. This recognition domain is unable to react with the double-stranded substrate, thus reducing the occurrence of leakage. This makes the cascade circuit successful.

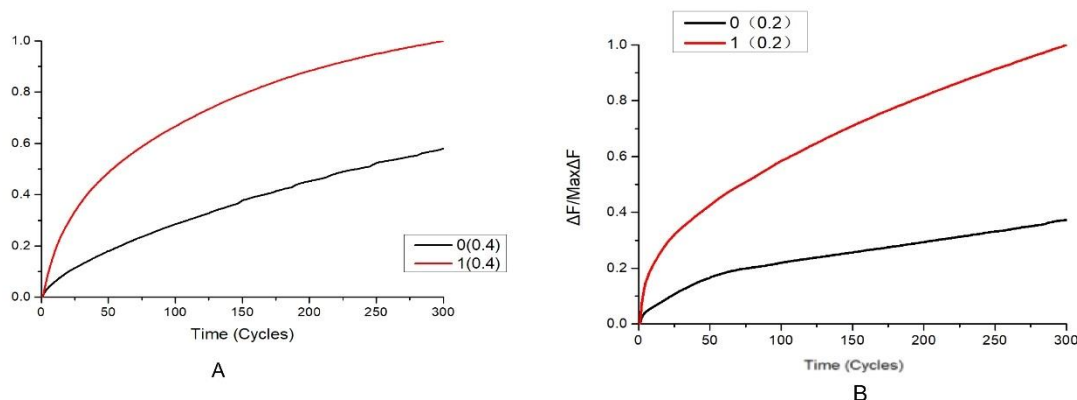

**Figure S5.** (A) A fluorescent map in which the recognition domain of one side and a part of the conserved domain are blocked. (B) In the case where the recognition domain of one side and a part of the conserved domain are blocked, the fluorescence map after the number of binding bases is increased.

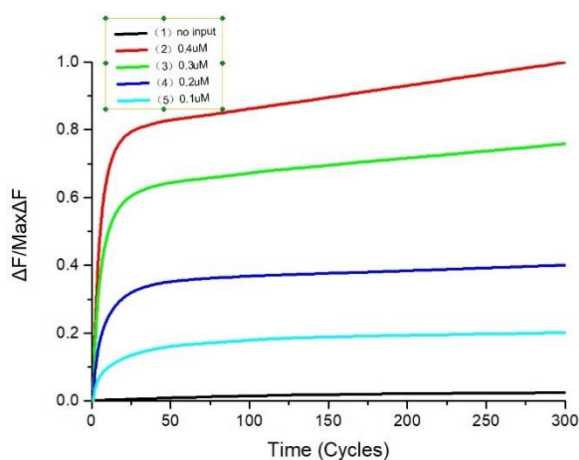

**Figure S6.** Input strand concentration gradient comparison. The input strand concentrations were 0.1  $\mu\text{M}$ , 0.2  $\mu\text{M}$ , 0.3  $\mu\text{M}$ , 0.4  $\mu\text{M}$ . The other DNA strand concentrations were 0.4  $\mu\text{M}$ . And the sampling scan interval is set to 13 s for a total of 300 cycles.

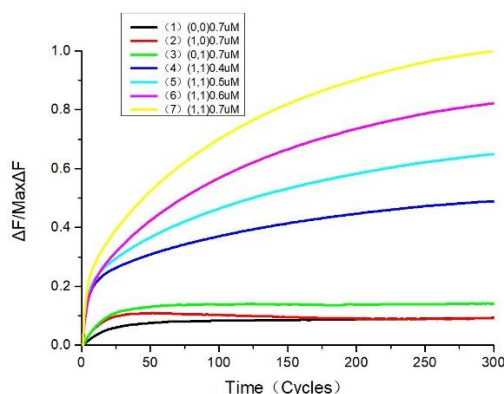

**Figure S7.** Input strand concentration gradient comparison of the YES-AND logic circuit. The input strand concentrations were 0.4  $\mu\text{M}$ , 0.5  $\mu\text{M}$ , 0.6  $\mu\text{M}$ , 0.7  $\mu\text{M}$ . The other DNA strand concentrations were 0.7  $\mu\text{M}$ . And the sampling scan interval is set to 2 min for a total of 300 cycles.

## 2.4 Self-catalytic DNA circuit

Adjust the  $\text{Mg}^{2+}$  concentration in the buffer to the standard data 12.5 mM, which is defined as 10x. For the DNA autocatalytic circuit, in the process of making the  $\text{Mg}^{2+}$  concentration gradient, it is found that the fluorescence intensity of the circuit system falls within a range when the fluorescence intensity is higher than 2.2x. That is, the concentration of  $\text{Mg}^{2+}$  reaches a saturated state. It is indicated that the presence of  $\text{Mg}^{2+}$  in the DNA autocatalytic circuit is more sensitive than other circuits.

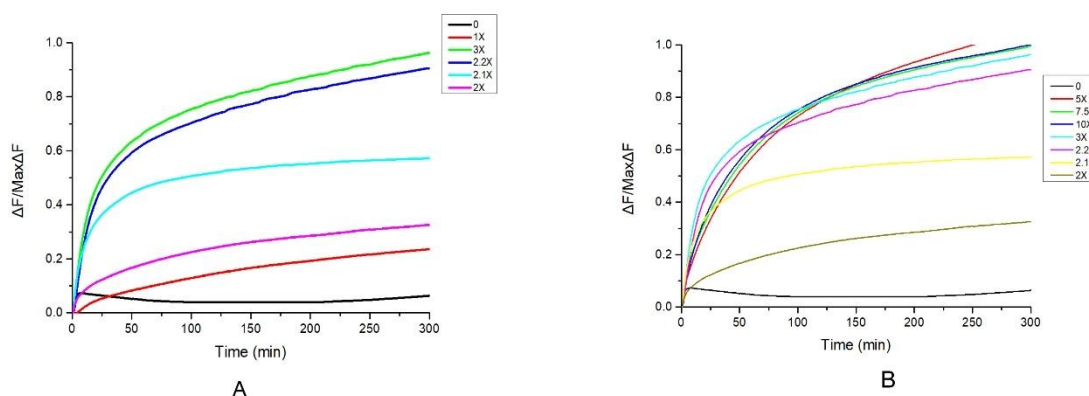

**Figure S8.** (A)  $\text{Mg}^{2+}$  concentration 0-3x fluorescence intensity curve. (B)  $\text{Mg}^{2+}$  concentration 0-10x fluorescence intensity curve.

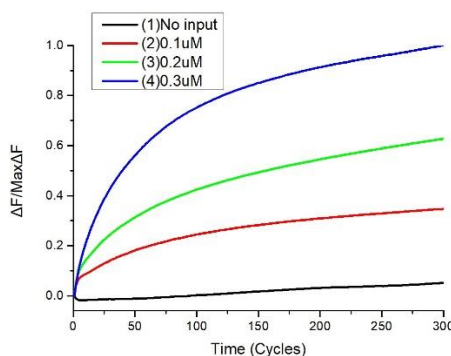

**Figure S9.** Input strand concentration gradient comparison of the Self-catalytic DNA circuit. The input strand concentrations were 0.1  $\mu\text{M}$ , 0.1  $\mu\text{M}$ , 0.1  $\mu\text{M}$ . The other DNA strand concentrations were 0.3  $\mu\text{M}$ . And the sampling scan interval is set to 50s for a total of 300 cycles.

## 2.5 Application of the principle of conformation changes in cleavage reaction

In order to verify whether the principles proposed in this study are applicable to DNAzyme cutting substrates located in double strands, we designed a YES logic gate based on DNAzyme cleavage. The experimental results prove that DNAzyme can cut the substrate that is not fully exposed in the double strand.

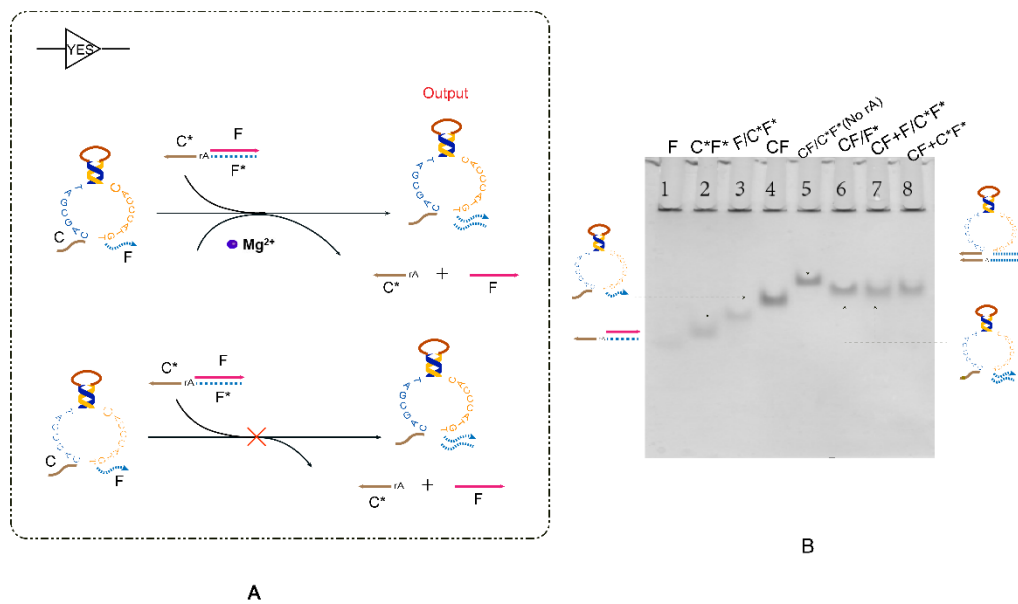

**Figure S10.** (A) YES logic gate for cutting the substrate in double strands using the principle of conformational change. (B) Native PAGE analysis of the YES logic gate.
